# Supplementary material
Source: Springer Nature journal article supplement (https://www.springermedizin.de/resource/supplementary/13018_2009_167_MOESM4_ESM.pdf/9636456)

# Severity of vascular injuries

Severity of vascular injuries (Vollmar)

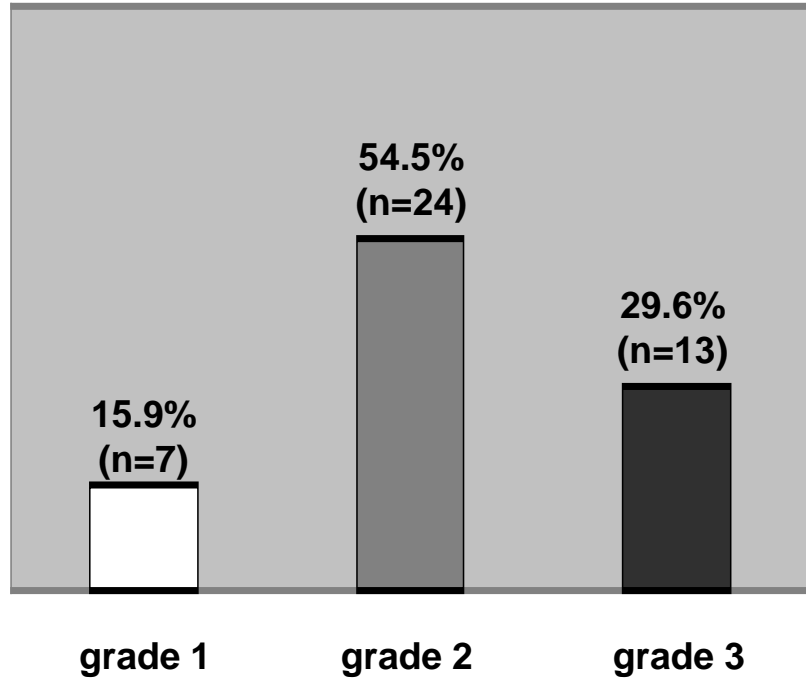

Mangled Extremity Severity Score

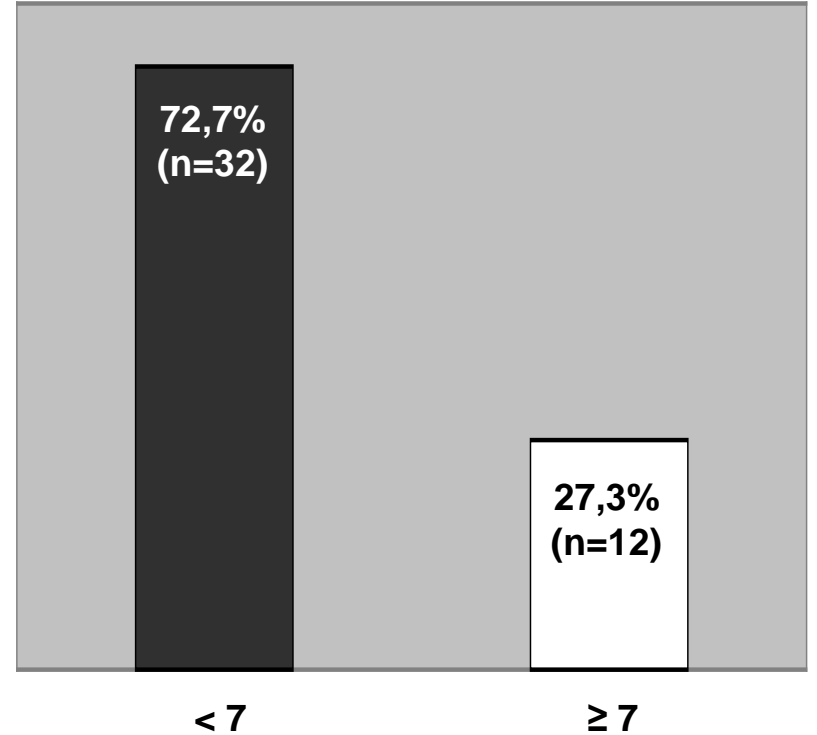

Supplement: MOESM4 [file 9636456]
